# Supplementary material for: A new MOF@bioactive glass composite reinforced with silver nanoparticles – a new approach to designing antibacterial biomaterials
Source: Royal Society of Chemistry journal article supplement (doi:10.1039/d4dt01190b), 2024-01-01
Supplement: d4dt01190b1.pdf [file d4dt01190b1.pdf]

## Supporting Information

# New MOF@bioactive glass composite reinforced with silver nanoparticles - a new approach to designing antibacterial biomaterials

*Marzena Fandzloch,<sup>\*a</sup> Adam W. Augustyniak,<sup>b</sup> Joanna Trzcińska-Wencel,<sup>c</sup> Patrycja Golińska<sup>c</sup>  
and Katarzyna Roszek<sup>c</sup>*

<sup>a</sup> Institute of Low Temperature and Structure Research, Polish Academy of Sciences, Okólna 2, 50-422, Wrocław, Poland. E-mail: m.fandzloch@intibs.pl

<sup>b</sup> Faculty of Chemistry, University of Wrocław, F. Joliot-Curie 14, 50-383, Wrocław, Poland.

<sup>c</sup> Faculty of Biological and Veterinary Sciences, Nicolaus Copernicus University in Toruń, Lwowska 1, 87-100, Toruń, Poland.

## Table of contents

|          |    |
|----------|----|
| Fig. S1  | 3  |
| Fig. S2  | 3  |
| Fig. S3  | 4  |
| Fig. S4  | 4  |
| Fig. S5  | 5  |
| Fig. S6  | 6  |
| Fig. S7  | 7  |
| Fig. S8  | 8  |
| Fig. S9  | 9  |
| Fig. S10 | 10 |
| Fig. S11 | 11 |
| Fig. S12 | 12 |
| Fig. S13 | 13 |
| Fig. S14 | 14 |

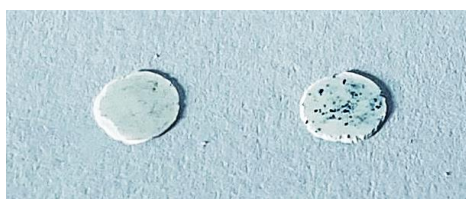

**Fig. S1** Photograph of BG (left) and Ag@Cu-MOF@BG (right) discs.

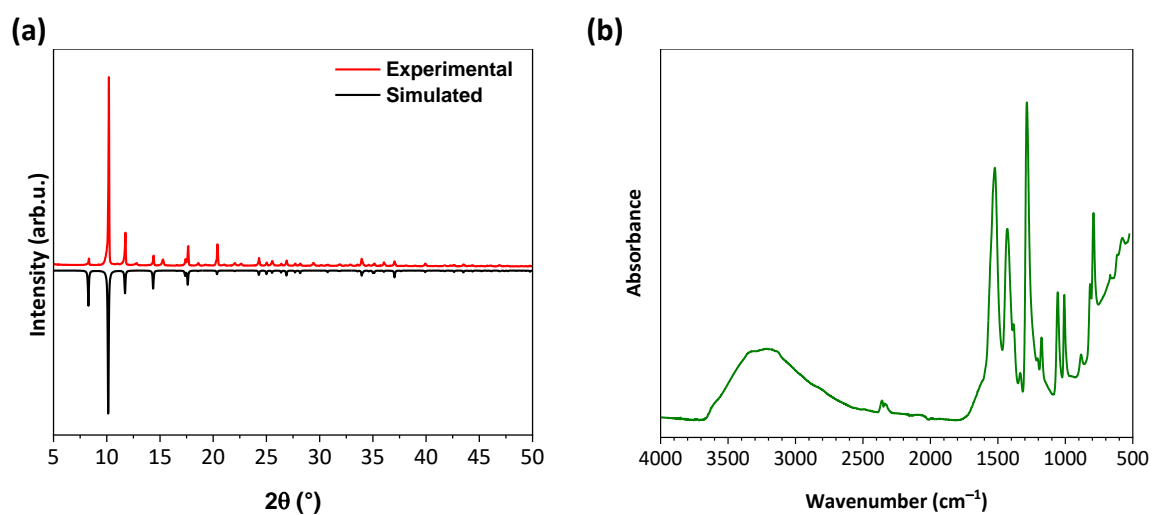

**Fig. S2** PXRD (a) and ATR-FTIR spectrum (b) of  $\text{NH}_4[\text{Cu}_3(\mu_3\text{-OH})(\mu_3\text{-4-carboxypyrazolato})_3]$  (Cu-MOF).

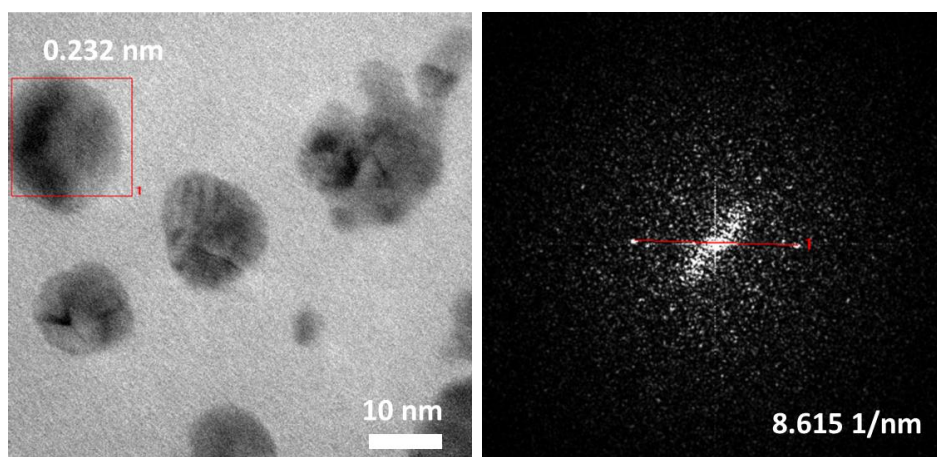

**Fig. S3** TEM image of Ag@Cu-MOF with FFT pattern of the selected red-colored region.

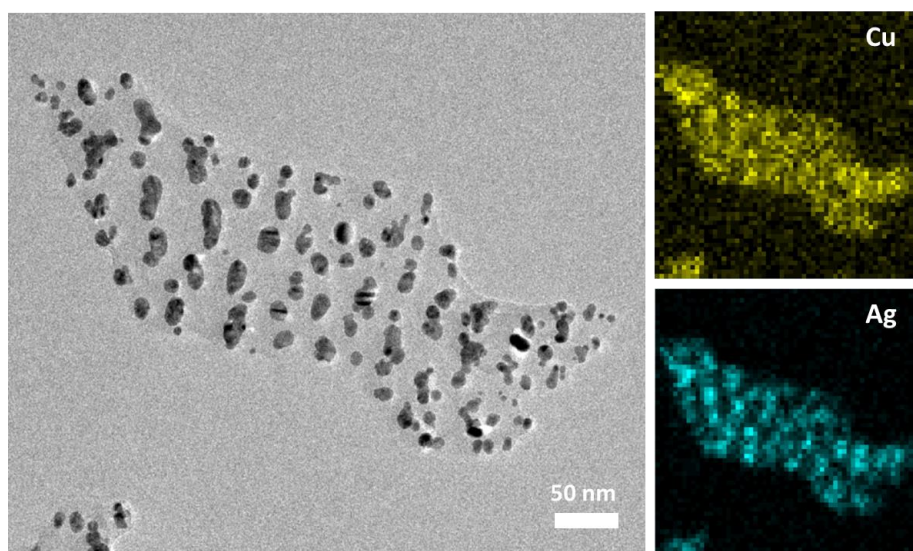

**Fig. S4** TEM image and EDX mapping analysis of Ag@Cu-MOF.

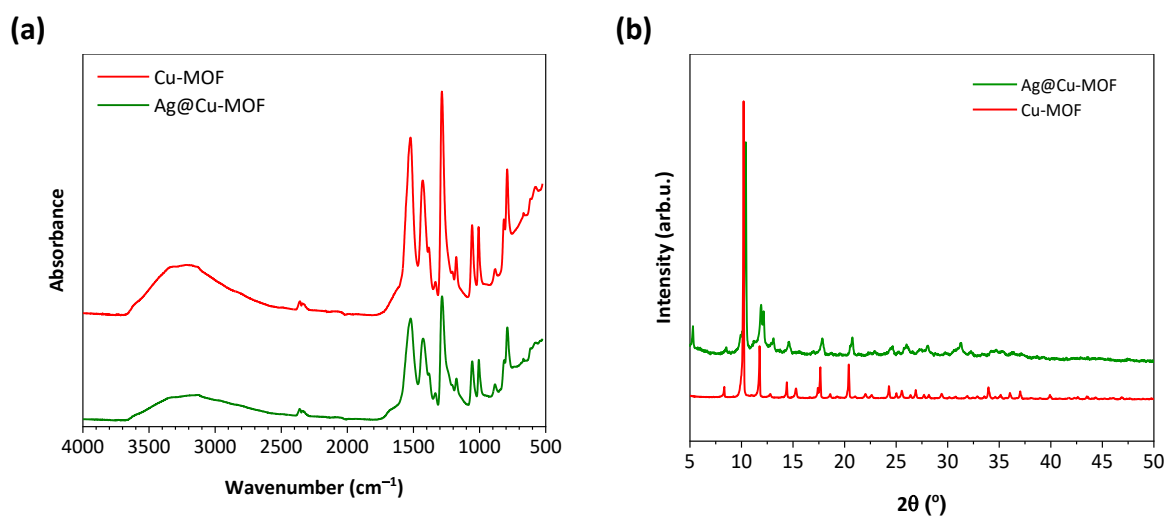

**Fig. S5** ATR-FTIR spectra (a) and PXRD (b) of Cu-MOF and Ag@Cu-MOF.

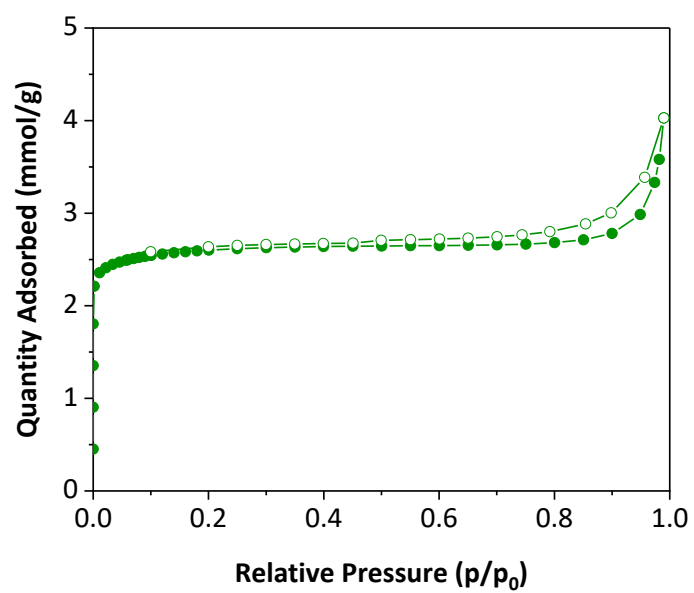

**Fig. S6** N<sub>2</sub> adsorption (filled symbols) and desorption (empty symbols) isotherm measured at 77 K for Ag@Cu-MOF.

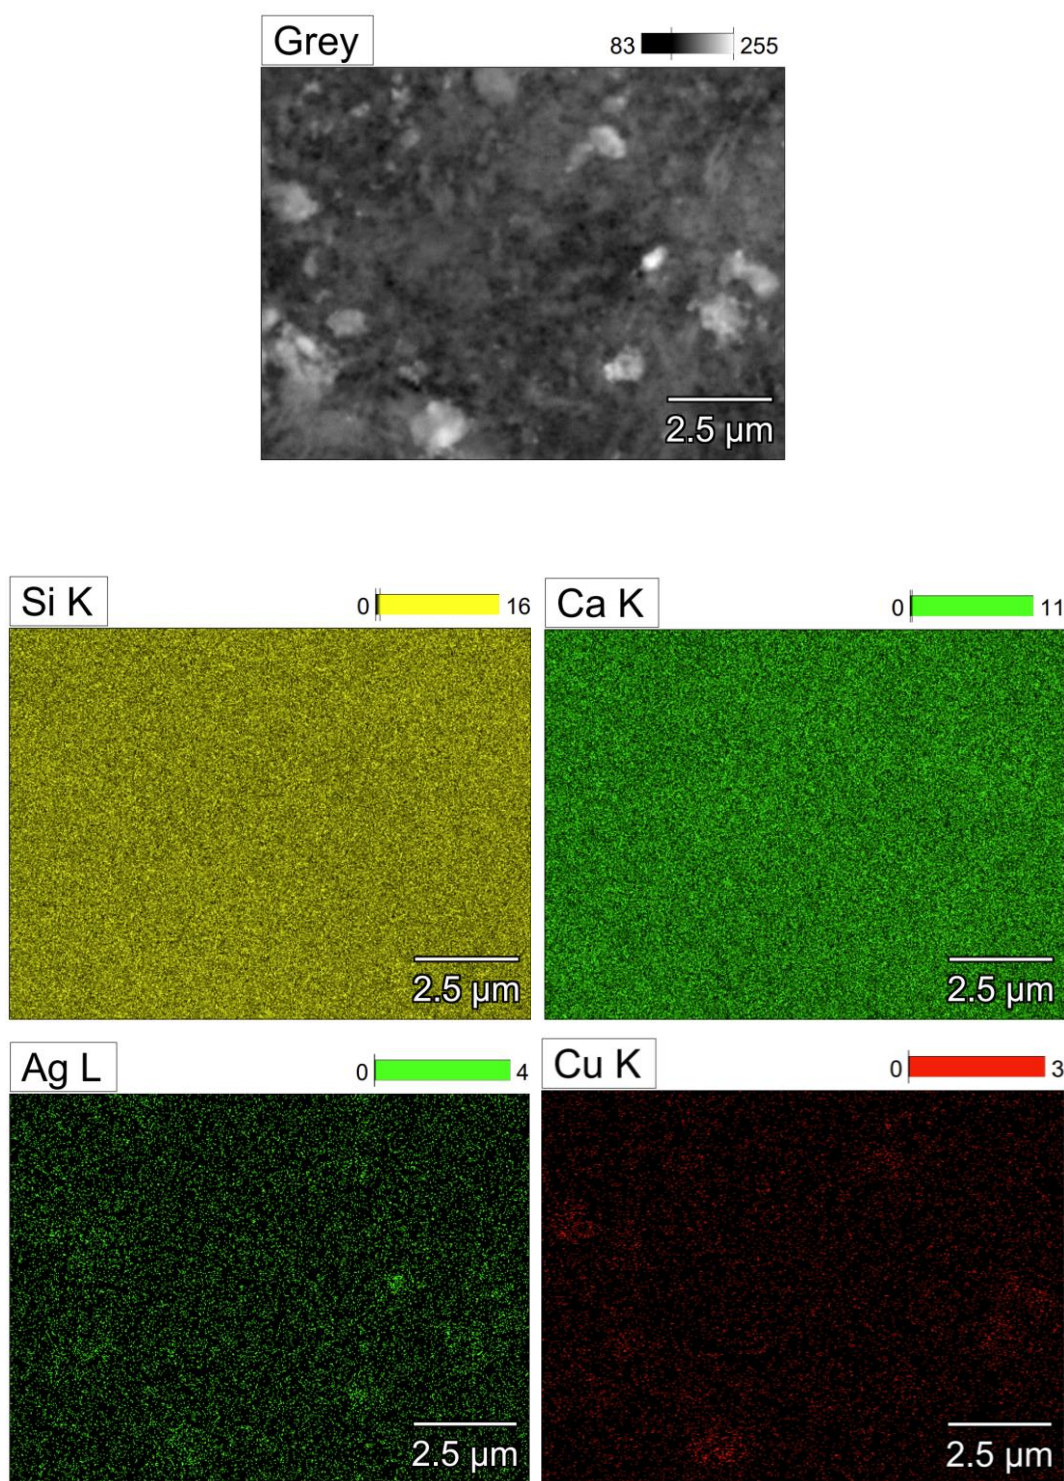

**Fig. S7** SEM-EDS elemental mapping of Ag@Cu-MOF@BG.

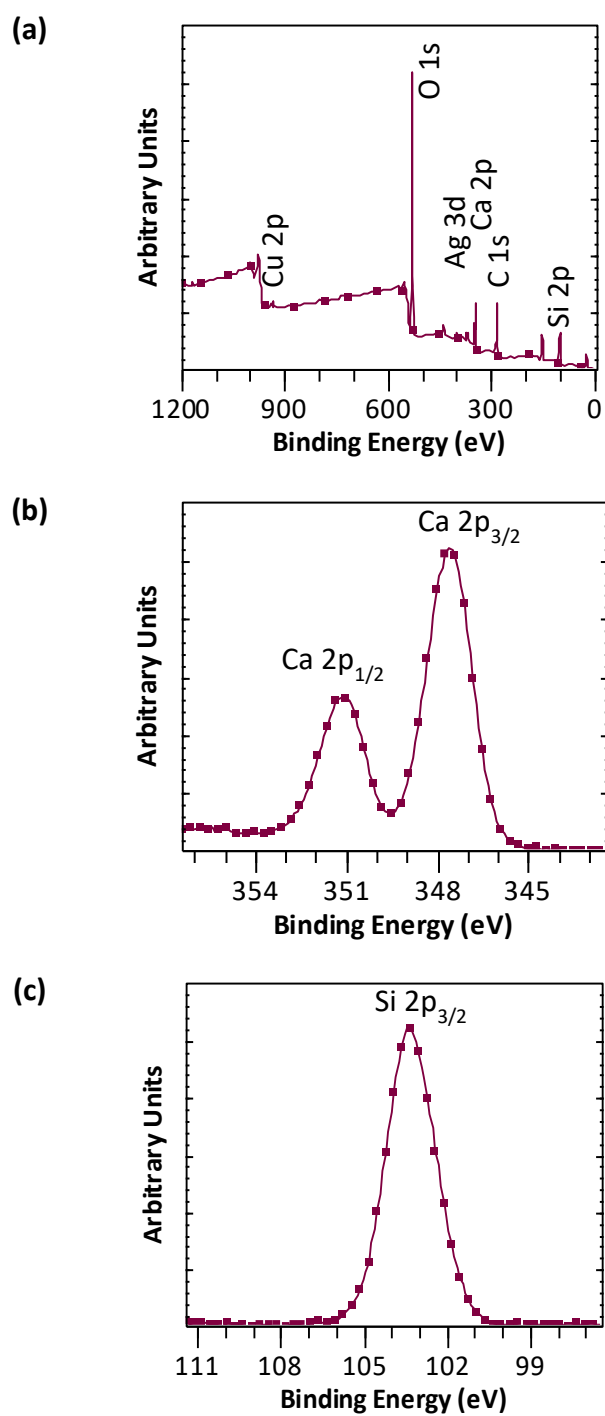

**Fig. S8** XPS survey spectrum of Ag@Cu-MOF@BG (a) and high-resolution XPS spectra of Ca 2p (b) and Si 2p (c).



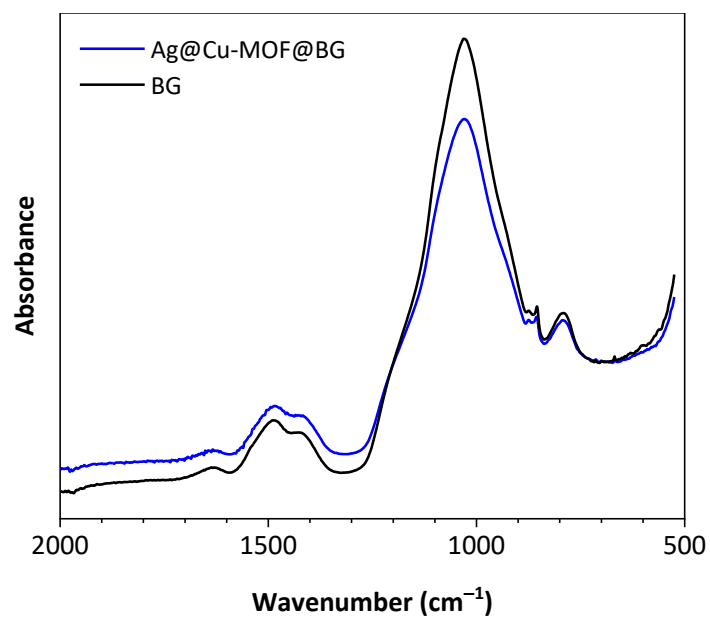

**Fig. S9** ATR-FTIR spectra of BG and Ag@Cu-MOF@BG.

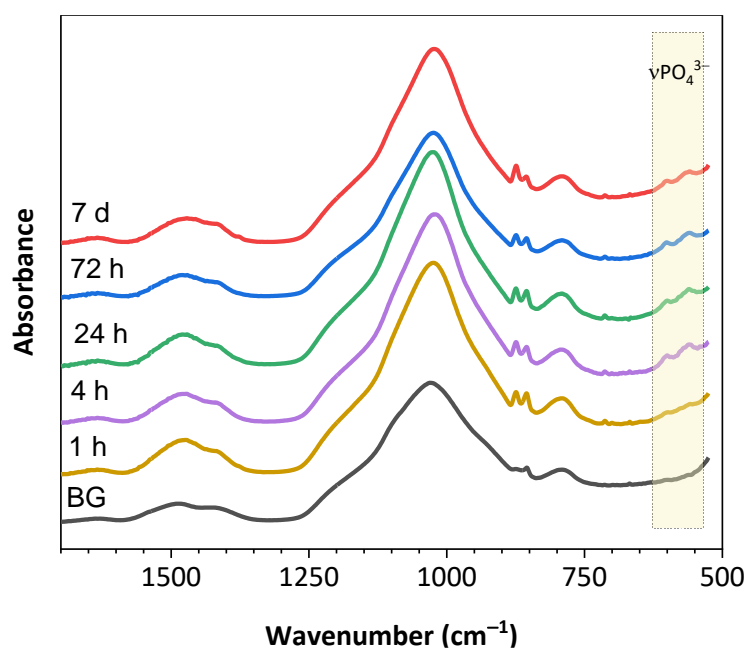

**Fig. S10** ATR-FIR spectra of BG before and after immersion in DPBS (pH 7.4, 37 °C, 1 hour - 7 days).

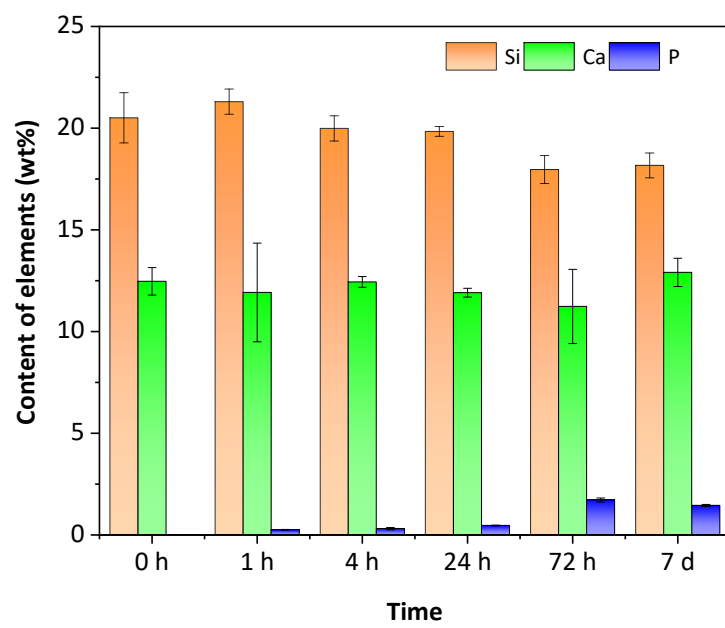

**Fig. S11** Analysis of the composition of BG after the bioactivity test monitored by ICP-OES.

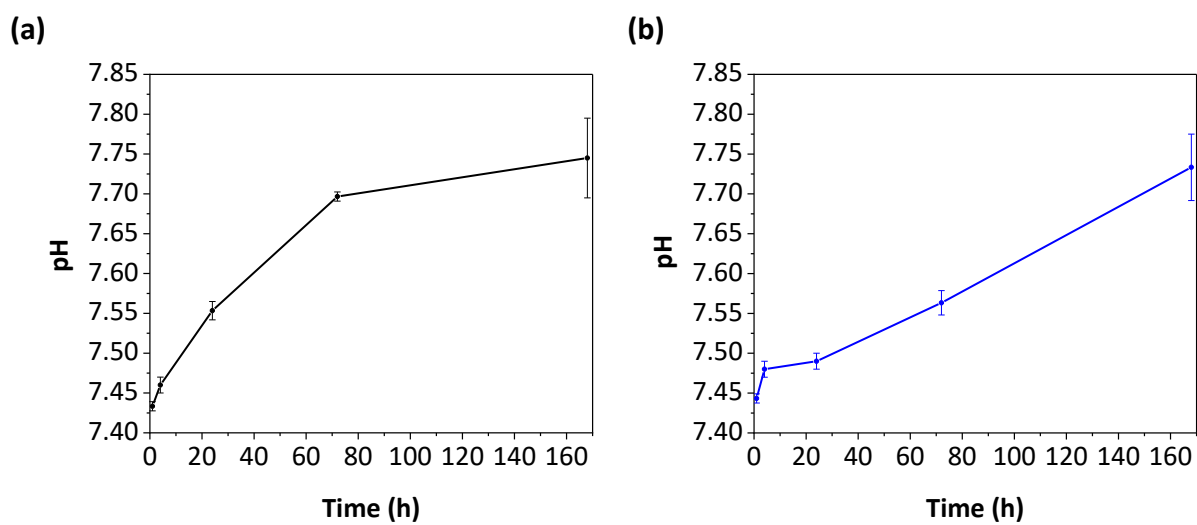

**Fig. S12** Changes in the pH value of the DPBS solution after immersion of BG (a) and Ag@Cu-MOF@BG (b) (37 °C, 0-7 days).

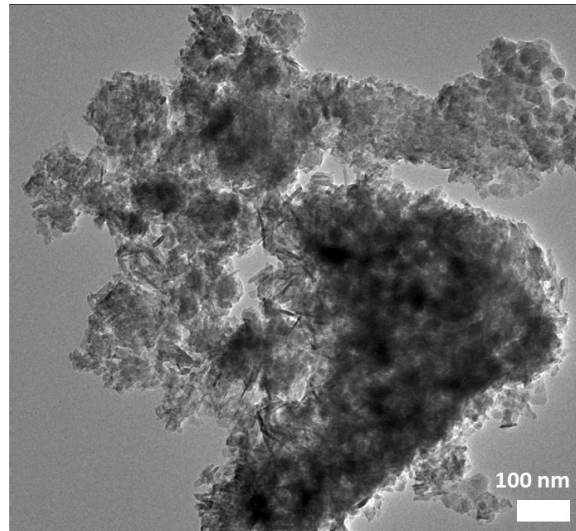

**Fig. S13** TEM image of BG after the 7<sup>th</sup> day of the bioactivity test.

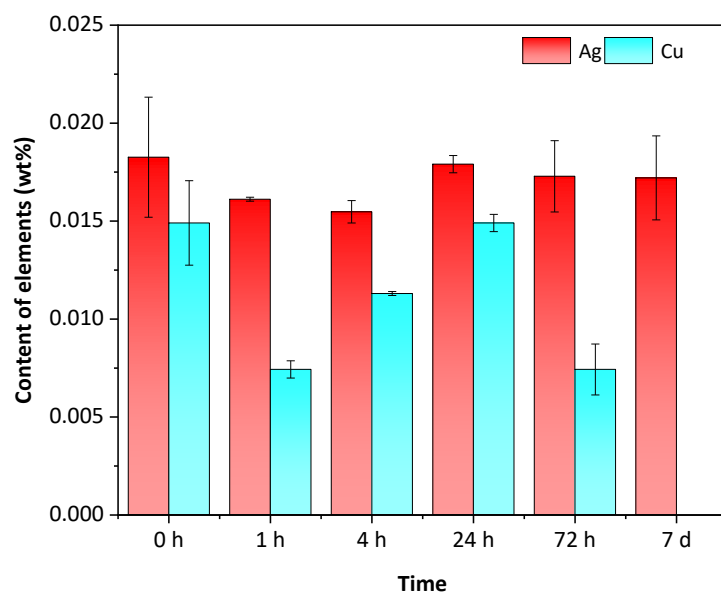

**Fig. S14** Analysis of the content (wt%) of Ag and Cu in Ag@Cu-MOF@BG after the bioactivity test monitored by ICP-OES.
